# Supplementary material for: Learning Gene Networks under SNP Perturbations Using eQTL Datasets
Source: PLOS journal article supplement (doi:10.1371/journal.pcbi.1003420), 2014-02-27
Supplement: S1 (10.1371/journal.pcbi.1003420.s001) [file journal.pcbi.1003420.s001]

## Text S1: Proof of Convexity of Sparse CGGM Optimization Problem

**Proposition 1.** *The optimization problem for learning a sparse CGGM given as below is convex:*

$$\underset{\Theta_{yy}, \Theta_{xy}}{\operatorname{argmin}} L(\Theta_{xy}, \Theta_{yy}; \mathbf{X}, \mathbf{Y}) + \lambda_1 \|\Theta_{xy}\|_1 + \lambda_2 \|\Theta_{yy}\|_1, \quad (1)$$

where  $L(\Theta_{xy}, \Theta_{yy}; \mathbf{X}, \mathbf{Y}) = 1/2 \operatorname{tr}(\mathbf{Y} \Theta_{yy} \mathbf{Y}^T) + \operatorname{tr}(\mathbf{X} \Theta_{xy} \mathbf{Y}^T) + \sum_i \log Z(\Theta_{xy}, \Theta_{yy}, \mathbf{x}^i)$  is the negative log-likelihood of data.

*Proof.* The  $L_1$  penalty is convex and we only need to show that the negative data log-likelihood  $L(\Theta_{xy}, \Theta_{yy}; \mathbf{X}, \mathbf{Y})$  in Eq. (1) is convex. To prove the convexity of  $L(\Theta_{xy}, \Theta_{yy}; \mathbf{X}, \mathbf{Y})$ , we use the standard approach for proving the convexity of a function by showing that the second derivative of the given function is positive definite [30]. We notice that a CGGM is a special case of a log-linear model. In addition, it is a standard result that the second derivative of negative data log-likelihood for a log-linear model is an expected feature covariance matrix [29]. Since a covariance matrix is always positive definite, the negative data log-likelihood for CGGM is convex.  $\square$
